1 **Involvement of the *doublesex* gene in body color masculinization of the**  
2 **blue-tailed damselfly, *Ischnura senegalensis***

3

4 Michihiko Takahashi<sup>1</sup>, Genta Okude<sup>2,3</sup>, Ryo Futahashi<sup>3</sup>, Yuma Takahashi<sup>1,2</sup>, Masakado  
5 Kawata<sup>1</sup>,

6

7 1. Graduate School of Life Sciences, Tohoku University, 6-3 Aramaki, Aoba,  
8 Sendai, 980-8578, Japan

9 2. Department of Biological Sciences, Graduate School of Science, the University  
10 of Tokyo, Hongo 7-3-1, Bunkyo-ku, Tokyo, 113-0033, Japan

11 3. Bioproduction Research Institute, National Institute of Advanced Industrial  
12 Science and Technology (AIST), Central 6, Tsukuba, Ibaraki 305-8566, Japan

13 4. Department of Biology, Faculty of Science, Chiba University, 1-33 Yayoi,  
14 Inage, Chiba 263-8522, Japan

15

16

17 Corresponding authors: Masakado Kawata, Tel: +81-22-795-6688, Fax: +81-22-795-

18 6689, E-mail: [kawata@m.tohoku.ac.jp](mailto:kawata@m.tohoku.ac.jp).

19

## 20 **Abstract**

21 Odonata (dragonflies and damselflies) display remarkable color pattern diversity  
22 including sexual dimorphism and intrasexual polymorphism. We previously found that  
23 expression of a sex-determining transcription factor, the *doublesex* (*dsx*) gene, is  
24 associated with female color polymorphism (gynomorph for female-specific color and  
25 andromorph for male mimicking color) in the blue-tailed damselfly, *Ischnura*  
26 *senegalensis*. Here we investigate the function of *dsx* gene on thoracic coloration by  
27 electroporation-mediated RNA interference (RNAi). RNAi of the *dsx* common region  
28 changed color patterns of males and andromorphic females to patterns of gynomorphic  
29 females. Further, gynomorphic color pattern was not affected by *dsx* RNAi. The long  
30 isoform of *dsx* RNAi produced no effects, suggesting that the short isoform of *dsx* is  
31 important for body color masculinization in both males and andromorphic females.  
32 Expression pattern changes were also examined in five genes with different expression  
33 levels between sexes and female morphs. Among these genes are two melanin  
34 suppressing genes, *black* and *ebony*, that were upregulated in the *dsx*-RNAi region  
35 compared to a control region. Upregulation coincides with a gynomorphic orange color  
36 instead of the black stripe observed in males and andromorphic females. *dsx* may  
37 regulate male color differentiation by suppressing *black* and *ebony* in the thoracic  
38 region of *I. senegalensis*. Results add to the understanding of molecular mechanisms  
39 underlying the evolution of female polymorphism in Odonata.

40 **Keywords:** *doublesex*, RNA interference, regulation of gene expression, female-limited  
41 polymorphism, insects, damselfly

42

## 43 **Introduction**

44 Many animals and plants exhibit intraspecific color polymorphism. Color  
45 polymorphism is well studied for its ecological and evolutionary significance, including  
46 reproductive strategies, speciation, mimicry and crypsis (Gray & McKinnon, 2007). As  
47 examples, male color polymorphism of the side-blotched lizard, *Uta stansburiana*, is  
48 part of a reproductive strategy similar to the children’s game, “rock-paper-scissors”  
49 (Sinervo & Lively, 1996), and female color polymorphism seen in several butterfly  
50 species is associated with Batesian mimicry (Krushnamegh Kunte, 2009; Mallet &  
51 Joron, 1999). Many Odonata (dragonflies and damselflies) species have intraspecific  
52 body or wing color variations that are sexually dimorphic and intrasexually  
53 polymorphic (Bybee et al., 2016; Corbet 1999; Futahashi, 2016, 2017; Tillyard, 1917).  
54 Most intrasexual color polymorphisms of Odonata are female-limited and have  
55 appeared independently multiple times within the order, Odonata (Fincke, Jödicke,  
56 Paulson, & Schultz, 2005). In female-limited color polymorphism, one morph, called  
57 the andromorph, typically resembles a conspecific male, while the other morph, called  
58 the gynomorph, shows female-specific color. Among Odonata, the genus, *Ischnura*, is a  
59 model group for studies of ecology and evolution of female polymorphism. Among 75  
60 *Ischnura* species, 29 have female-limited color polymorphism, associated with mating

61 strategy (Rosa A. Sánchez-Guillén et al., 2018; Willink, Duryea, & Svensson, 2019).  
62 Polyandrous species often display female polymorphism, and most monandrous species  
63 are monomorphic (Robinson and Allgeyer, 1996; Sánchez-Guillén *et al.*, 2018).  
64 Female-limited polymorphism in *Ischnura* is maintained by negative frequency-  
65 dependent selection and balancing selection derived from male mating harassment  
66 (Andres, Sanchez, & Cordero, 2000; Takahashi, Nagata, & Kawata, 2013; Takahashi,  
67 Kagawa, Svensson, & Kawata, 2014). In addition to body color, other phenotypic traits  
68 such as flying distance, larval duration and wing length also differ between  
69 andromorphic and gynomorphic females (van Gossum *et al.*, 2001; Abbott and Gosden,  
70 2009). In several *Ischnura* species, female-limited color polymorphisms are controlled  
71 by an autosomal locus with two or three alleles (Cordero, 1990; Cordero & Andres,  
72 1999; Johnson, 1964, 1966; R A Sánchez-Guillén, van Gossum, & Cordero, 2005;  
73 Takahashi et al., 2014), although little is known about the genes involved in the color  
74 polymorphisms.

75         Recently, a master gene that controls female-limited polymorphism was  
76 identified in several insect species (Kunte et al., 2014; Nishikawa et al., 2015; Woronik  
77 et al., 2019; Yassin, Chung, Veuille, David, & Pool, 2016; Yassin, Delaney, et al.,  
78 2016) (Kunte et al., 2014; Nishikawa et al., 2015; Yassin et al., 2016a, 2016b; Woronik  
79 et al., 2019). Among the swallowtail butterflies species in the genus, *Papilio*, a sex-  
80 determining transcription factor, the *doublesex (dsx)* gene, is involved in female limited  
81 Batesian mimicry (Iijima et al., 2018; Kunte et al., 2014; Nishikawa et al., 2015; Palmer



82 & Kronforst, 2020). Expression of the *dsx* gene is also associated with female color  
83 polymorphism in the blue-tailed damselfly, *Ischnura senegalensis* (Takahashi,  
84 Takahashi, & Kawata, 2019). Adult female *I. senegalensis* display two color morphs,  
85 gynomorphic and andromorphic. The former morph is dominant.. Males and  
86 andromorphic females display a greenish color with black mid-dorsal and humeral  
87 stripes on their thorax; gynomorphic immature females display an orange color without  
88 black humeral stripes (Fig. 2). The short isoform of the *dsx* gene is expressed  
89 predominantly in males, the long isoform of *dsx* gene is expressed predominantly in  
90 females (Takahashi et al., 2019). Notably, expression of the short *dsx* isoform is higher  
91 in andromorphic females compared with gynomorphic females (Takahashi et al., 2019),  
92 suggesting that *dsx* is involved in female color polymorphism as well as sexual color  
93 dimorphism. In this study, using electroporation-mediated RNAi techniques, the effects  
94 of the *dsx* gene on adult thoracic color patterns in the blue-tailed damselfly, *I.*  
95 *senegalensis*, were investigated. The *dsx* gene is essential for masculinization of body  
96 color but is not involved in expression of the gynomorphic color pattern. Also, *dsx*  
97 knockdown in males and andromorphic females promoted expression of melanin and  
98 suppressed genes, *black* and *ebony*, compared to expression in gynomorphic females.  
99 The *dsx* gene may regulate masculinization of thoracic body color through the  
100 repression of *black* and *ebony* genes in *I. senegalensis*.

101

## 102 **Materials and Methods**

103 **Insects**

104 Adult female *I. senegalensis* were collected at Heiwasouzou, Makabe, Kakinohana and  
105 Shikiya on Okinawa Island in May 2017, April and October 2018, and June 2019.  
106 Mature females were placed in plastic cups (diameter 11 cm, height 4 cm) with a wet  
107 paper filter at room temperature for oviposition. Newly hatched larvae were reared  
108 together for approximately 1 month, then transferred to small plastic containers  
109 (diameter 3 cm, height 5 cm) for individual rearing. Larvae were fed with *Artemia* brine  
110 shrimp and *Tubifex* worms until early final instar. Sexes of larvae were judged by the  
111 presence of an ovipositor under the abdomen. Although color morphs of larvae cannot  
112 be determined, genetically recessive andromorphic females were expected to be  
113 obtained from eggs derived from andromorphic females. It should be noted that female  
114 morph frequency differs significantly among populations (e.g., gynomorph frequency is  
115 high (>90%) at Makabe, and low (<40%) at Kakinohana), despite small genetic  
116 distances among populations at Okinawa Island (Inomata, Hironaka, Sawada,  
117 Kuriwada, & Yama, 2015).

118

119 **Electroporation-mediated RNAi experiment**

120 A small interfering RNA was designed using the siDirect program version 2.0  
121 (<http://sidirect2.rnai.jp/>). For each gene of *I. senegalensis*, two siRNAs were designed  
122 and mixed (100 mM each). Target sequences for the *dsx* common region were 5'- AAC

123 ATG AAT TTC GTC AAA GAT GC-3' and 5'- ACG CAA TTC TGC AAA ATG  
124 CAA GG-3', whereas those for *dsx* long isoform-specific region were 5'- AAC GAA  
125 AAG CAG AAA AAG GAATG-3' and 5'- AAG TGA TAA TGC GAC GTA TAT  
126 TG-3' (Fig. 1a). siRNA for the *dsx* short isoform-specific region was not designed  
127 because only the junction site is different. Part of long isoform would include region 2  
128 because region 2 was shown in reverse transcription PCR of gynomorphic females (data  
129 not shown). siRNAs for the *multicopper oxidase 2 (MCO2)* gene that is essential for  
130 melanin pigmentation (Okude, Futahashi, Kawahara-Miki, et al., 2017), were used as  
131 positive controls for targeting 5'- GAGCACTTTCCGTTATCAATATA-3' and 5'-  
132 TCCTCTTGATGCTATCTGTAATG-3'. As a negative control, siRNA for the  
133 *enhanced green fluorescent protein (EGFP)* gene was used for targeting 5'- CGG CAT  
134 CAA GGT GAA CTT CAA GA-3' (Ando & Fujiwara, 2013).

135           Electroporation was used to introduce siRNA into larvae (Okude, Futahashi,  
136 Kawahara-Miki, et al., 2017). Early-stage, final instar larvae (stage 1 in Okude,  
137 Futahashi, Tanahashi, & Fukatsu, 2017) were anesthetized on ice for 1 min,  
138 approximately 1 µl of 100 µM siRNA solution was injected into the left side of the  
139 thorax using a glass needle and an injector (Nanoject II; Drummond Scientific  
140 Company). Immediately after injection, droplets of ultrasound gel were placed near the  
141 injection site and on the right side of the thorax opposite the injection site. Positive and  
142 negative platinum electrodes were attached to injection and opposite sites, respectively  
143 (Fig. 1b, Okude, Futahashi, Kawahara-Miki, et al., 2017). Electroporation was

144 conducted with five or ten pulses for 25 V (each 280 ms pulses/s) using an  
145 electroporator (Cure-Gene; CellProduce). Each larva was placed on a wet paper in a  
146 plastic case individually for a day to confirm recovery from anesthesia. Injected larvae  
147 were reared at room temperature until adult emergence. Since more than half the  
148 individual larvae died before adult emergence, only adults that emerged normally were  
149 used for phenotype observation. Of note, adult phenotypes were patchy around the area  
150 where the positive electrode was placed (Fig. 2).

151

## 152 **Quantitative PCR of adult knock-down *dsx***

153 To estimate RNAi efficiency of *dsx* gene electroporation, and to investigate expression  
154 of five sex and morph-associated genes (*black*, *ebony*, *chp*, *eas* and *RhoGEF*),  
155 quantitative reverse transcription polymerase chain reaction (qRT-PCR) was used. Total  
156 RNA was extracted from the left side of thorax with gynomorph-like color where  
157 siRNA was introduced and from the control region on the right side of the thorax of the  
158 same individual (N = 4 each for male and andromorphic female adults) using  
159 RNAqueous™-Micro Total RNA Isolation Kit (Thermo Fisher). cDNA was synthesized  
160 using SuperScript IV Reverse Transcriptase (Thermo Fisher) and subjected to real-time  
161 quantitative PCR using the StepOne Real-Time PCR System (Thermo Fisher) with  
162 Power SYBR Green PCR Master Mix (Applied Biosystems). Standards for each gene  
163 (*dsx* short isoform, *black*, *ebony*, *chp*, *eas* and *RhoGEF*) for qRT-PCR were generated  
164 by PCR using Tks Gflex DNA Polymerase (TaKaRa) and gene-specific primers (Table

165 S1). The *ribosomal protein L13 (RpL13)* gene was used as an internal standard to  
166 estimate relative mRNA expression (Table S2). The expression levels were visualized  
167 relative to maximal expression, defined as a level of 1 for each transcript. Statistically  
168 significant differences in gene expression were evaluated using the generalized linear  
169 model (GLM) assuming a gamma distribution.

170

## 171 **Results**

### 172 **The *dsx* gene is involved in body color masculinization in *I. senegalensis***

173 We first investigated the effects of electroporation-mediated RNAi for *MCO2* (positive  
174 control) and *EGFP* (negative control) genes. Of fifteen individuals (four male, three  
175 andromorphic female, and eight gynomorphic female adults) that subjected to the  
176 *MCO2* RNAi and emerged normally, ten individuals (10/15 = 67%) exhibited patchy  
177 unpigmented regions on the left side of the thorax where the positive electrode was  
178 placed for electroporation (Table 1, Fig. 2, arrows). This observation is consistent with  
179 Okude, Futahashi, Kawahara-Miki, et al., (2017). After *EGFP* gene RNAi  
180 electroporation, 10 individuals (two male, one andromorphic female, and seven  
181 gynomorphic female adults) emerged normally, and no individuals showed an  
182 unpigmented area at the site of cathode placement (Table 2, Fig. 2).

183 We next performed electroporation-mediated RNAi for the *dsx* common region  
184 (both short and long isoforms) or long isoform only. Of 41 individuals (17 male, nine

185 andromorphic female, and 15 gynomorphic female adults) that subjected to RNAi of the  
186 *dsx* common region and emerged normally, importantly, 14 males (14/17 = 82%) and  
187 seven andromorphic females (7/9 = 78%) showed patchy orange-colored regions  
188 resembling gynomorphic females (Table 3, Fig. 2, arrows). None of the 15  
189 gynomorphic females exhibited this color change (Table 3, Fig. 2). RNAi of *dsx* long  
190 isoform caused no noticeable effect in 31 emerged adults (nine males, four  
191 andromorphic females, and 18 gynomorphic females) (Table 4, Fig. 2). The suppression  
192 ratio for *dsx* expression (short isoform) was estimated and confirmed a significant  
193 reduction in the left side in males ( $P = 0.01963$ , Fig. 3); such significant reduction was  
194 not detected in andromorphic females ( $P = 0.1667$ , Fig. 3). Low efficiency for the  
195 reduction in target gene expression is likely due to extraction of RNA from both tissues  
196 affected by electroporation and from surrounding tissues.

197

### 198 ***dsx* knockdown promotes two melanin suppressing genes *black* and *ebony***

199 *dsx* encodes a transcription factor that regulates the expression of several downstream  
200 genes (Chatterjee, Uppendahl, Chowdhury, Ip, & Siegal, 2011; Matson & Zarkower,  
201 2012). In addition to the *dsx* gene, *black*, *ebony*, *choptin* (*chp*), *easily shocked* (*eas*),  
202 and *rho guanine nucleotide exchange factor* (*RhoGEF*) genes are also differentially  
203 expressed in female morphs and between sexes (Takahashi et al., 2019). These genes  
204 represent candidate *dsx* target genes. Expression of these five genes between *dsx*-RNAi  
205 and control regions was evaluated. Expression of two melanin suppressing genes, *black*

206 in males and *ebony* in andromorphic females, were higher on the left side (Fig. 3,  
207 asterisks  $P < 0.05$ ) and resembled expression in gynomorphic females. No significant  
208 differences in expression were detected for the remaining three genes, *chp*, *eas* and  
209 *RhoGEF* (Fig. 3).

210

## 211 **Discussion**

212 *dsx* is involved in male-type color pattern formation, but not in female-specific  
213 gynomorphic coloration in *I. senegalensis*. The male *dsx* isoform is essential for male  
214 differentiation in most insects, while the female *dsx* isoform is involved in female  
215 differentiation only in holometabolous insects (Wexler et al., 2019; Zhou, Whitworth,  
216 Pozmanter, Neville, & Doren, 2018). Our results are consistent with previous work on  
217 male differentiation. Like *Ischnura* damselflies, some butterflies display female color  
218 polymorphism, in which one morph resembles male coloration (Kunte et al., 2014;  
219 Palmer & Kronforst, 2020). Functional analysis suggests that changes in total  
220 expression level and protein sequences, but not isoform patterns, are important for  
221 female polymorphisms in butterflies (Nishikawa et al., 2015). These findings contrast  
222 with the current results for *Ischnura* damselflies.

223 Based on qRT-PCR analyses, *black* and *ebony* were identified as *dsx* target gene  
224 candidates. *black* and *ebony* encode aspartate decarboxylase and *N*- $\beta$ -alanyldopamine  
225 (NBAD) synthase, respectively. Both enzymes are essential for the synthesis of NBAD

226 that is involved in hardening of the cuticle, and for reddish and yellowish coloration  
227 (Arakane, Noh, Asano, & Kramer, 2016; Futahashi & Fujiwara, 2005; Liu, Lemonds,  
228 Marden, & Popadić, 2016; Wittkopp, Carroll, & Kopp, 2003). Based on phenotypes of  
229 other insects, upregulation of *black* and *ebony* is consistent with a color change from  
230 black humeral stripes to orange. These results strongly suggest that *dsx* suppresses *black*  
231 and *ebony* in males and andromorphic females, and induces a change from a female to a  
232 male color pattern. Elucidation of the regulatory mechanism of *dsx* splicing patterns  
233 may clarify the evolution of female color polymorphism as well as sexual color  
234 dimorphism in Odonata.

235

## 236 **Acknowledgments**

237 We thanks Okinawa Prefectural Agricultural Research Center for collecting samples,  
238 Shinichiro Maruyama for advices of experiments and Koji Tamura for access to his  
239 real-time quantitative PCR equipment. This study was partially supported by JSPS  
240 Research Fellowship for Young Scientists and

241

## 242 **Reference**

243 Abbott, J. K., & Gosden, T. P. (2009). Correlated morphological and colour differences  
244 among females of the damselfly *Ischnura elegans*. *Ecological Entomology*, 34(3),  
245 378–386. doi: 10.1111/j.1365-2311.2009.01087.x



- 246 Ando, T., & Fujiwara, H. (2013). Electroporation-mediated somatic transgenesis fo  
247 rapid functional analysis in insects. *Development*, *118*(2), 401–415. doi: 8223268
- 248 Andres, J. A., Sanchez, R. A., & Cordero, R. A. (2000). Molecular evidence for  
249 selection on female color polymorphism in the damselfly *Ischnura graellsii*.  
250 *Evolution*, *54*(6), 2156–2161.
- 251 Arakane, Y., Noh, M. Y., Asano, T., & Kramer, K. J. (2016). Tyrosine metabolism for  
252 insect cuticle pigmentation and sclerotization. In *Extracellular Composite Matrices*  
253 *in Arthropods* 165–220. doi: 10.1007/978-3-319-40740-1\_6
- 254 Bybee, S., Córdoba-Aguilar, A., Duryea, M. C., Futahashi, R., Hansson, B., Lorenzo-  
255 Carballa, M. O., ... Wellenreuther, M. (2016). Odonata (dragonflies and  
256 damselflies) as a bridge between ecology and evolutionary genomics. *Frontiers in*  
257 *Zoology*, *13*(1), 46. doi: 10.1186/s12983-016-0176-7
- 258 Chatterjee, S. S., Uppendahl, L. D., Chowdhury, M. A., Ip, P., & Siegal, M. L. (2011).  
259 The female-specific Doublesex isoform regulates pleiotropic transcription factors  
260 to pattern genital development in *Drosophila*. *Development*, *138*, 1099–1109. doi:  
261 10.1242/dev.055731
- 262 Corbet, P. S. (1999). Dragonflies: behaviour and ecology of Odonata. *Dragonflies:*  
263 *Behaviour and Ecology of Odonata*.
- 264 Cordero, A. (1990). The adaptive significance of the prolonged copulations of the  
265 damselfly, *Ischnura graellsii* (Odonata: Coenagrionidae). *Anim. Behav.*, *40*, 43–48.

- 266 Cordero, A., & Andres, J. A. (1999). Lifetime mating success, survivorship and  
267 synchronized reproduction in the damselfly *Ischnura pumilio* (Odonata:  
268 Coenagrionidae). *Int J Odonatol*, 2, 105–114.
- 269 Fincke, O. M., Jödicke, R., Paulson, D. R., & Schultz, T. D. (2005). The evolution and  
270 frequency of female color morphs in Holarctic Odonata: why are male-like females  
271 typically the minority? *International Journal of Odonatology*, 8, 183–212.
- 272 Futahashi, R. (2016). Color vision and color formation in dragonflies. *Current Opinion*  
273 *in Insect Science*, 17, 32–39. doi: 10.1016/j.cois.2016.05.014
- 274 Futahashi, R. (2017). Molecular mechanisms underlying color vision and color  
275 formation in dragonflies. *Diversity and Evolution of Butterfly Wing Patterns: An*  
276 *Integrative Approach*, 303–320. doi: 10.1007/978-981-10-4956-9
- 277 Futahashi, R., & Fujiwara, H. (2005). Melanin-synthesis enzymes coregulate stage-  
278 specific larval cuticular markings in the swallowtail butterfly, *Papilio xuthus*.  
279 *Development Genes and Evolution*, 215(10), 519–529. doi: 10.1007/s00427-005-  
280 0014-y
- 281 Gray, S. M., & McKinnon, J. S. (2007). Linking color polymorphism maintenance and  
282 speciation. *Trends in Ecology and Evolution*, 22(2), 71–79. doi:  
283 10.1016/j.tree.2006.10.005
- 284 Iijima, T., Kajitani, R., Komata, S., Lin, C. P., Sota, T., Itoh, T., & Fujiwara, H. (2018).  
285 Parallel evolution of Batesian mimicry supergene in two *Papilio* butterflies, *P.*

- 286 *polytes* and *P. memnon*. *Science Advances*, 4(4), eaao5416. doi:  
287 10.1126/sciadv.aao5416
- 288 Inomata, N., Hironaka, K., Sawada, K., Kuriwada, T., & Yama, K. (2015). Discrepancy  
289 in the degree of population differentiation between color-morph frequencies and  
290 neutral genetic loci in the damselfly *Ischnura senegalensis* in Okinawa Island,  
291 Japan. *Genetica*, 143, 271–277. doi: 10.1007/s10709-015-9821-x
- 292 Johnson, C. (1964). The inheritance of female dimorphism in the damselfly, *Ischnura*  
293 *damula*. *Genetics*, 49, 513–519.
- 294 Johnson, C. (1966). Genetics of female dimorphism in *Ischnura demorsa*. *Heredity*, 21,  
295 453–459.
- 296 Kunte, Krushnamegh. (2009). The diversity and evolution of batesian mimicry in  
297 papilio swallowtail butterflies. *Evolution*, 63(10), 2707–2716. doi: 10.1111/j.1558-  
298 5646.2009.00752.x
- 299 Kunte, K., Zhang, W., Tenger-Trolander, A., Palmer, D. H., Martin, A., Reed, R. D., ...  
300 Kronforst, M. R. (2014). *doublesex* Is a mimicry supergene. *Nature*, 507(7491),  
301 229–232. doi: 10.1038/nature13112
- 302 Liu, J., Lemonds, T. R., Marden, J. H., & Popadić, A. (2016). A pathway analysis of  
303 melanin patterning in a hemimetabolous insect. *Genetics*, 203(1), 403–413. doi:  
304 10.1534/genetics.115.186684

- 305 Mallet, J., & Joron, M. (1999). Evolution of diversity in warning color and mimicry:  
306 polymorphisms, shifting balance, and speciation. *Annual Review of Ecology and*  
307 *Systematics*, 30(1), 201–233. doi: 10.1146/annurev.ecolsys.30.1.201
- 308 Matson, C. K., & Zarkower, D. (2012). Sex and the singular DM domain: insights into  
309 sexual regulation, evolution and plasticity. *Nature Reviews. Genetics*, 13(3), 163–  
310 174. doi: 10.1038/nrg3161
- 311 Nishikawa, H., Iijima, T., Kajitani, R., Yamaguchi, J., Ando, T., Suzuki, Y., ...  
312 Fujiwara, H. (2015). A genetic mechanism for female-limited Batesian mimicry in  
313 *Papilio* butterfly. *Nature Genetics*, 47(4), 405–409. doi: 10.1038/ng.3241
- 314 Okude, G., Futahashi, R., Kawahara-Miki, R., Yoshitake, K., Yajima, S., & Fukatsu, T.  
315 (2017). Electroporation-mediated RNA interference reveals a role of the  
316 *multicopper oxidase 2* gene in dragonfly cuticular pigmentation. *Applied*  
317 *Entomology and Zoology*, 52(3), 379–387. doi: 10.1007/s13355-017-0489-9
- 318 Okude, G., Futahashi, R., Tanahashi, M., & Fukatsu, T. (2017). Laboratory rearing  
319 system for *Ischnura senegalensis* (insecta: odonata) enables detailed description of  
320 larval development and morphogenesis in dragonfly. *Zoological Science*, 34(5),  
321 386. doi: 10.2108/zs170051
- 322 Palmer, D. H., & Kronforst, M. R. (2020). A shared genetic basis of mimicry across  
323 swallowtail butterflies points to ancestral co-option of *doublesex*. *Nature*  
324 *Communications*, 11(1), 1–10. doi: 10.1038/s41467-019-13859-y

- 325 Robinson, J. V., & Allgeyer, R. (1996). Covariation in life-history traits, demographics  
326 and behaviour in ischnuran damselflies: the evolution of monandry. *Biological*  
327 *Journal of the Linnean Society*, 58, 85–98. doi: 10.1111/j.1095-  
328 8312.1996.tb01662.x
- 329 Sánchez-Guillén, R A, van Gossum, H., & Cordero, A. (2005). Hybridization and the  
330 inheritance of female colour polymorphism in two ischnurid damselflies (Odonata:  
331 Coenagrionidae ). *Biological Journal of the Linnean Society*, 85, 471–481.
- 332 Sánchez-Guillén, Rosa A., Cordero-Rivera, A., Rivas-Torres, A., Wellenreuther, M.,  
333 Bybee, S., Hansson, B., ... Dumont, H. (2018). The evolutionary history of colour  
334 polymorphism in Ischnura damselflies. *Journal of Evolutionary Biology*,  
335 jeb.13289. doi: 10.1111/jeb.13289
- 336 Sinervo, B., & Lively, C. M. (1996). The rock-paper-scissors game and the evolution of  
337 alternative male strategies. *Nature*, 380(6571), 240–243. doi: 10.1038/380240a0
- 338 Takahashi, M., Takahashi, Y., & Kawata, M. (2019). Candidate genes associated with  
339 color morphs of female-limited polymorphisms of the damselfly *Ischnura*  
340 *senegalensis*. *Heredity*, 122(1), 81–92. doi: 10.1038/s41437-018-0076-z
- 341 Takahashi, Y, Nagata, N., & Kawata, M. (2013). Antagonistic selection factors induce a  
342 continuous population divergence in a polymorphism. *Heredity*, 112(September),  
343 391–398. doi: 10.1038/hdy.2013.117

- 344 Takahashi, Yuma, Kagawa, K., Svensson, E. I., & Kawata, M. (2014). Evolution of  
345 increased phenotypic diversity enhances population performance by reducing  
346 sexual harassment in damselflies. *Nature Communications*, *5*, 1–7. doi:  
347 10.1038/ncomms5468
- 348 Tillyard, R. J. (1917). The biology of dragonflies (Odonata or Paraneuroptera).  
349 *Cambridge Univ Press*.
- 350 van Gossum, H., Stoks, R., & Bruyn, L. De. (2001). Frequency-dependent male mate  
351 harassment and intra-specific variation in its avoidance by females of the damselfly  
352 *Ischnura elegans*. *Behavioral Ecology and Sociobiology*, *51*, 69–75. doi:  
353 10.1007/s002650100418
- 354 Wexler, J., Delaney, E. K., Belles, X., Schal, C., Wada-Katsumata, A., Amicucci, M. J.,  
355 & Kopp, A. (2019). Hemimetabolous insects elucidate the origin of sexual  
356 development via alternative splicing. *ELife*, *8*. doi: 10.7554/eLife.47490
- 357 Willink, B., Duryea, M. C., & Svensson, E. I. (2019). Macroevolutionary origin and  
358 adaptive function of a polymorphic female signal involved in sexual conflict. *The*  
359 *American Naturalist*, *194*(5), 707–724. doi: 10.1086/705294
- 360 Wittkopp, P. J., Carroll, S. B., & Kopp, A. (2003). Evolution in black and white:  
361 Genetic control of pigment patterns in *Drosophila*. *Trends in Genetics*, *19*(9), 495–  
362 504. doi: 10.1016/S0168-9525(03)00194-X

- 363 Woronik, A., Tunström, K., Perry, M. W., Neethiraj, R., Stefanescu, C., Celorio-  
364 Mancera, M. de la P., ... Wheat, C. W. (2019). A transposable element insertion is  
365 associated with an alternative life history strategy. *Nature Communications*, *10*(1),  
366 1–11. doi: 10.1038/s41467-019-13596-2
- 367 Yassin, A., Chung, H., Veuille, M., David, J. R., & Pool, J. E. (2016). Ancient  
368 balancing selection at tan underlies female. *Nature Communications*, 1–7. doi:  
369 10.1038/ncomms10400
- 370 Yassin, A., Delaney, E. K., Reddiex, A. J., Seher, T. D., Bastide, H., Appleton, N. C.,  
371 ... Kopp, A. (2016). The *pdm3* locus is a hotspot for recurrent evolution of female-  
372 limited color dimorphism in *Drosophila*. *Current Biology*, *26*(18), 2412–2422. doi:  
373 10.1016/j.cub.2016.07.016
- 374 Zhou, H., Whitworth, C., Pozmanter, C., Neville, M. C., & Doren, M. Van. (2018).  
375 *fruitless* functions downstream of *doublesex* to promote sexual dimorphism of the  
376 gonad stem cell niche. *BioRxiv*, 454546. doi: 10.1101/454546

377

## 378 **Data Accessibility**

- 379 Data of RNAi adult phenotypes will be available in Dryad. The expression levels of *dsx*  
380 and *dsx* target genes from real-time quantitative PCR are listed in Supplementary Table  
381 S2.

382

383 **Author Contributions**

384 M. T., Y. T. and M.K. designed research. M. T., G. O. and R. F. conducted RNAi  
385 experiment. M. T. conducted real-time quantitative PCR experiment and statistical  
386 analysis. M. T. wrote the first draft manuscript, and all authors contributed to the  
387 improvement of the manuscript.

388



389 Figure 1.

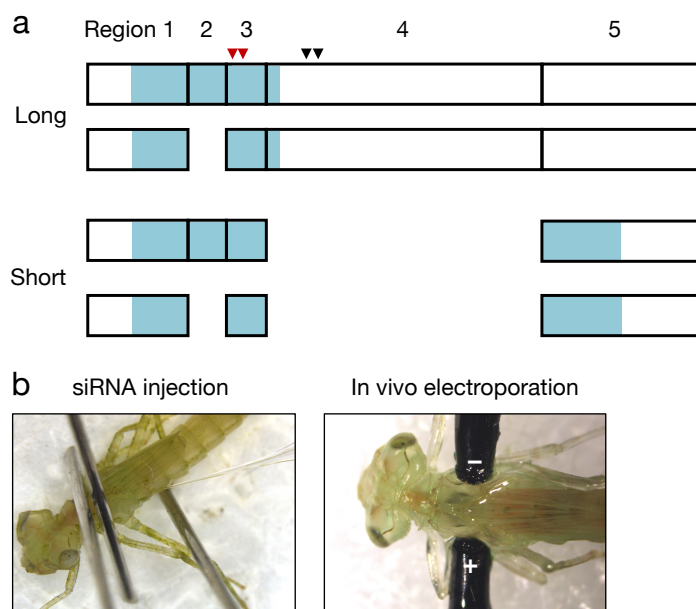

390

391

392 Figure 2.

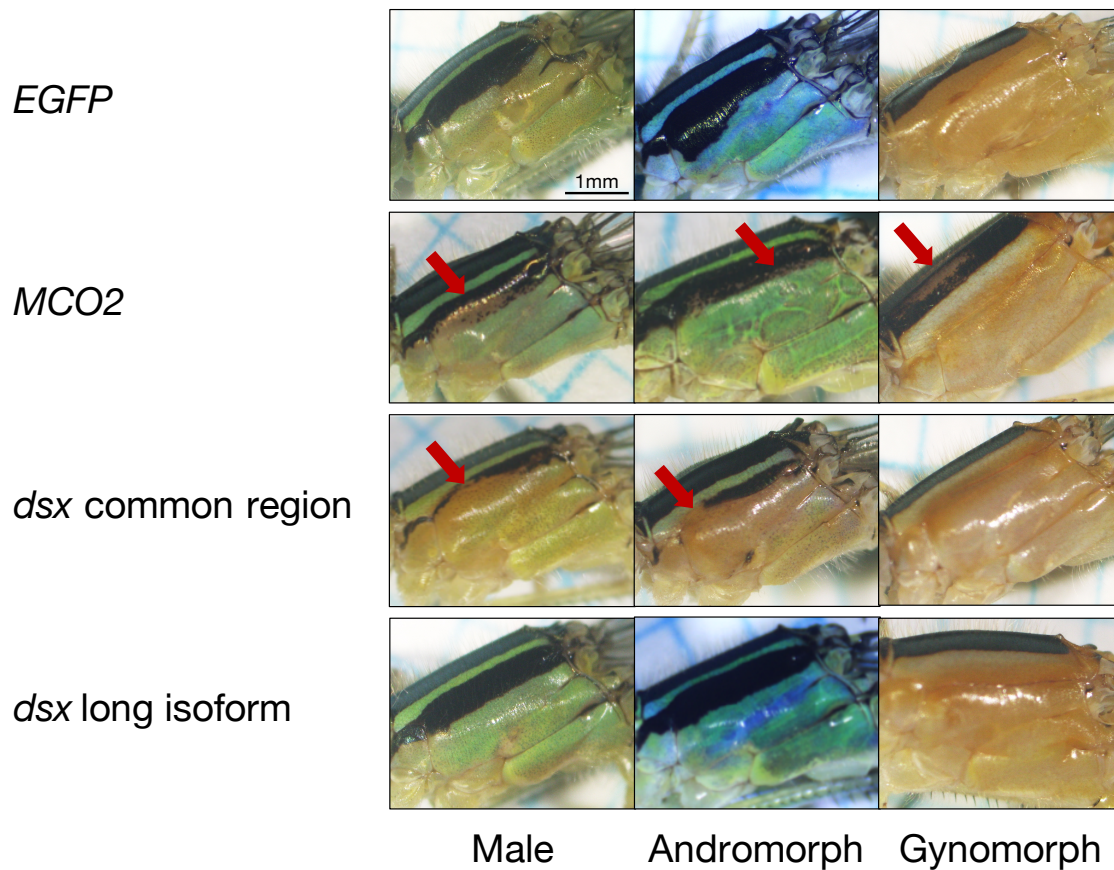

393

394

395 Figure 3.

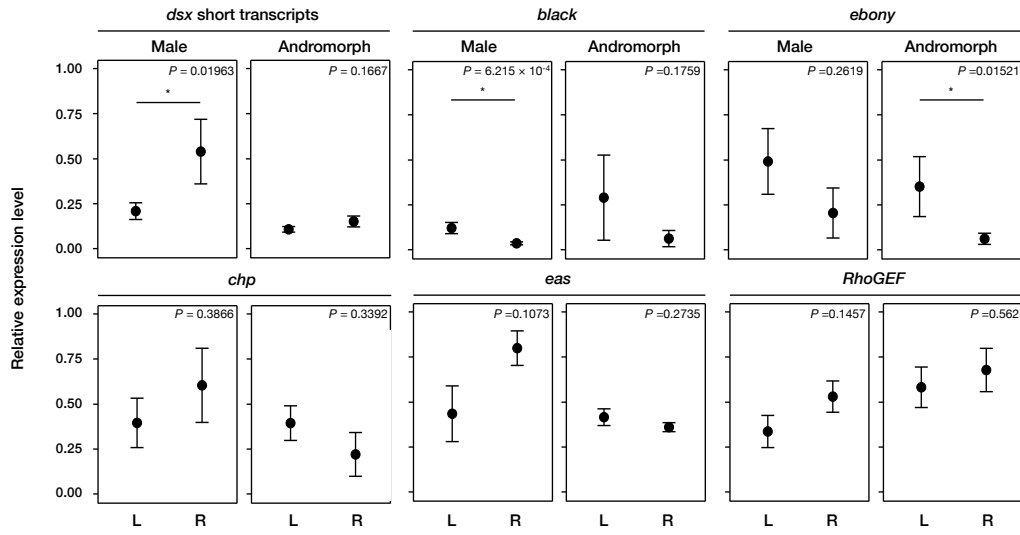

396

397

398 **Titles and legends to figures**

399

400 **Fig. 1** The positions of *dsx* small interfering RNAs (siRNAs)(**a**) and  
401 electroporation-mediated RNA interference (RNAi) process (**b**). **a** Summary of  
402 *dsx* isoform (modified from Takahashi et al., 2019). The red and black  
403 arrowheads indicate siRNA regions for the common region and long isoform,  
404 respectively. The blue boxes indicate open reading frames. Numbers above boxes  
405 are region identifiers. Based on RNAseq and qRT-PCR analyses, region 2 was  
406 sometimes skipped for both long and short isoforms. **b** After siRNA injection,  
407 electroporation is performed with positive and negative electrodes placed on left  
408 and right side of the thoraxes, respectively, with droplets of ultrasound gel.

409

410 **Fig. 2** RNAi knockdown phenotypes observed in the thorax of *I. senegalensis*.  
411 Vertical axis is target genes of RNAi. No phenotypic effects in the body color of  
412 *EGFP* RNAi individuals were observed. *MCO2* RNAi individuals of all the three  
413 morphs mostly exhibited patchy unpigmented regions on the left side of the  
414 thorax (arrows) where the positive electrode was placed for electroporation. The  
415 thorax colors of males and andromorphs were changed into orange by *dsx*  
416 common region RNAi (arrows). RNAi of *dsx* long isoform did not cause any  
417 color changes in the thorax of all the three morphs.

418

419       **Fig. 3** qRT-PCR analyses of *dsx* and candidates for *dsx* target genes between *dsx*  
420       (common region) RNAi region (L; left side of the thorax) and control region (R;  
421       right side of the thorax) ( $N = 4$  for each male and andromorph). (a) *dsx* (short  
422       isoform), (b) *black*, (c) *ebony*, (d) *chaoptin (chp)*, (e) *easily shocked (eas)* and (f)  
423       *rho guanine nucleotide exchange factor (RhoGEF)*. Data represent mean  $\pm$  S.E.  
424       Asterisks in the figure indicate significant differences ( $P < 0.05$ ) evaluated using  
425       the Generalized Linear Model (GLM) assuming a gamma distribution.

426 Table 1. Summary of RNAi results for *MCO2* gene

| Morph       | Emerged adults | Normal pigmentation | Partial changes of pigmentation |
|-------------|----------------|---------------------|---------------------------------|
| Males       | 4              | 1 (25%)             | 3 (75%)                         |
| Andromorphs | 3              | 1 (33%)             | 2 (67%)                         |
| Gynomorphs  | 8              | 3 (37.5%)           | 5 (62.5%)                       |

427

428 Table 2. Summary of RNAi results for *EGFP* gene (negative control)

| Morph       | Emerged adults | Normal pigmentation | Partial changes of pigmentation |
|-------------|----------------|---------------------|---------------------------------|
| Males       | 2              | 2 (100%)            | None                            |
| Andromorphs | 1              | 1 (100%)            | None                            |
| Gynomorphs  | 7              | 7 (100%)            | None                            |

429

430 Table 3. Summary of RNAi results for *dsx* gene (common region)

| Morph       | Emerged adults | Normal pigmentation | Partial changes of pigmentation |
|-------------|----------------|---------------------|---------------------------------|
| Males       | 17             | 3 (18%)             | 14 (82%)                        |
| Andromorphs | 9              | 2 (22%)             | 7 (78%)                         |
| Gynomorphs  | 15             | 15 (100%)           | None                            |

431

432

433 Table 4. Summary of RNAi results for *dsx* gene (long isoform only)

| Morph       | Emerged adults | Normal pigmentation | Partial changes of pigmentation |
|-------------|----------------|---------------------|---------------------------------|
| Males       | 9              | 9 (100%)            | None                            |
| Andromorphs | 4              | 4 (100%)            | None                            |
| Gynomorphs  | 18             | 18 (100%)           | None                            |

434
